# Supplementary material for: Understanding and Predicting Social Media Use Among Community Health Center Patients: A Cross-Sectional Survey
Source: PubMed Central journal article supplement (PMC4260084; doi:10.2196/jmir.3373), 2014-11-26
Supplement: jmir_v16i11e270_app1.pdf [file jmir_v16i11e270_app1.pdf]

## Appendix 1. Theoretical Constructs and Survey Questions

| Construct                            | Questions                                                                                                                                                                                                                                             | Citation               |
|--------------------------------------|-------------------------------------------------------------------------------------------------------------------------------------------------------------------------------------------------------------------------------------------------------|------------------------|
| Attitude                             | I think that using social media to get health information and support would: <ul style="list-style-type: none"> <li>· be enjoyable</li> <li>· be useful</li> <li>· benefit my health</li> </ul>                                                       | (Cameron et al., 2012) |
| Subjective Norm                      | People that are important to me recommend that I use social media for getting health information and support.                                                                                                                                         | (Cameron et al., 2012) |
|                                      | If I use social media to get health information and support, people that are important to me would approve.                                                                                                                                           |                        |
|                                      | I think most of my acquaintances use social media for getting health information and support                                                                                                                                                          |                        |
| Perceived Behavioral Control         | For me, using social media to get health information and/or support would be easy.                                                                                                                                                                    | (Cameron et al., 2012) |
|                                      | I feel capable enough to use social media to get health information and support.                                                                                                                                                                      |                        |
|                                      | I know how to use social media to get health information and support.                                                                                                                                                                                 |                        |
| Intention to Use                     | I plan to use social media sometime within the next week to get health information and/or support.                                                                                                                                                    | (Cameron et al., 2012) |
|                                      | I plan to use social media in the next week to communicate with others about health.                                                                                                                                                                  |                        |
|                                      | I intend to use social media to post more information about my health for others to view in the next week.                                                                                                                                            |                        |
| Behavior                             | I use social media to get health information and support.                                                                                                                                                                                             | (Cameron et al., 2012) |
|                                      | I use social media to check for health updates on people that are important to me.                                                                                                                                                                    |                        |
|                                      | I share information about my health through social media.                                                                                                                                                                                             |                        |
| Patient Social Media Use Preferences | Social media should be used to: <ul style="list-style-type: none"> <li>· connect me with other patients who have the same health condition</li> <li>· help me talk to my doctor</li> <li>· help me get health information about my illness</li> </ul> | (Steele, 2011)         |

|                                                               |                                                                                                                                                                                                                                                                                                                                                   |                                     |
|---------------------------------------------------------------|---------------------------------------------------------------------------------------------------------------------------------------------------------------------------------------------------------------------------------------------------------------------------------------------------------------------------------------------------|-------------------------------------|
| <p>Patient Social Media Use</p>                               | <p>How often do you use...</p> <ul style="list-style-type: none"> <li>· Facebook, MySpace, Linkedin, Blogs, Twitter, YouTube, Other Online Forums, Email, Mobile phone for texting, Mobile phone apps</li> </ul>                                                                                                                                  | <p>(Fisher &amp; Clayton, 2012)</p> |
| <p>Preference for Health Care Provider Using Social Media</p> | <p>In addition to regular office visits, my health care provider should use which of the following to share health information and to help me stay healthy:</p> <ul style="list-style-type: none"> <li>· Facebook, MySpace, Linkedin, Blogs, Twitter, YouTube, Other Online Forums, Email, Mobile phone for texting, Mobile phone apps</li> </ul> | <p>(Fisher &amp; Clayton, 2012)</p> |
